# Supplementary material for: Cyclin B1 stability is increased by interaction with BRCA1, and its overexpression suppresses the progression of BRCA1-associated mammary tumors
Source: PubMed Central journal article supplement (PMC6191436; doi:10.1038/s12276-018-0169-z), 2018-10-16
Supplement: 12276_2018_169_MOESM1_ESM.pdf [file 12276_2018_169_MOESM1_ESM.pdf]

## **Supplemental Information**

**Cyclin B1 stability is increased by interaction with BRCA1 and its overexpression suppresses the progression of BRCA1-associated mammary tumors**

*Eun Kyung Choi, Jeong-A Lim, Jong Kwang Kim, Moon Sun Jang, Sun Eui Kim, Hye Jung Baek, Eun Jung Park, Tae Hyun Kim, Chu-Xia Deng, Rui-Hong Wang, and, Sang Soo Kim*

**Supplementary Table 1. List of vinblastine response-associated genes**

| Symbol        | Name                                                                 | Correlation with RTV | Feature Type             | Chr | Strand | Start     | End       | Ensembl ID         | Entrez Gene ID |
|---------------|----------------------------------------------------------------------|----------------------|--------------------------|-----|--------|-----------|-----------|--------------------|----------------|
| G720483E21RIK | RIKEN cDNA G720483E21 gene                                           | 0.976190476190476    | lincRNA gene             | 1   | -      | 20886550  | 20890473  | ENSMUG000000097934 | 77741          |
| Cold66        | colled-coll domain containing 66                                     | 0.976190476190476    | protein coding gene      | 14  | -      | 27481090  | 27508460  | ENSMUG000000046753 | 320324         |
| Cif2a1        | general transcription factor II A, 1                                 | 0.976190476190476    | protein coding gene      | 12  | -      | 91555910  | 91590487  | ENSMUG000000020962 | 83602          |
| Crbp          | corticotropin releasing hormone binding protein                      | 0.975900072948533    | protein coding gene      | 13  | -      | 95431376  | 95444831  | ENSMUG000000021680 | 12919          |
| Ndufb6        | NADH dehydrogenase (ubiquinone) 1 beta subcomplex, 6                 | 0.952380952380952    | protein coding gene      | 4   | -      | 40270591  | 40279421  | ENSMUG000000071014 | 23075          |
| Ppib          | peptidyl prolyl isomerase H                                          | 0.952380952380952    | protein coding gene      | 4   | -      | 11930010  | 119320546 | ENSMUG000000062088 | 66101          |
| Pp4c          | protein phosphatase 4, catalytic subunit                             | 0.952380952380952    | protein coding gene      | 7   | -      | 126785866 | 126792496 | ENSMUG000000030697 | 56420          |
| Baat          | bile acid-Coenzyme A: amino acid N-acyltransferase                   | 0.951876318105963    | protein coding gene      | 4   | -      | 49489422  | 49506557  | ENSMUG000000039653 | 12012          |
| Dmrt2         | doublesex and mab-3 related transcription factor 2                   | 0.946124746911475    | protein coding gene      | 19  | +      | 25672420  | 25679010  | ENSMUG000000048138 | 23649          |
| Ain1          | aryl hydrocarbon receptor-interacting protein-like 1                 | 0.934148484292342    | protein coding gene      | 11  | -      | 72027963  | 72037509  | ENSMUG000000040554 | 114230         |
| 9530077C05RIK | RIKEN cDNA 9530077C05 gene                                           | 0.928571428571428    | protein coding gene      | 9   | +      | 22411513  | 22444681  | ENSMUG000000036411 | 68283          |
| Ccdc124       | coiled-coil domain containing 124                                    | 0.928571428571428    | protein coding gene      | 8   | -      | 70868227  | 70873935  | ENSMUG000000007721 | 234388         |
| Cdhr2         | cadherin 2                                                           | 0.928571428571428    | protein coding gene      | 18  | -      | 16588877  | 16809246  | ENSMUG000000024304 | 12558          |
| Dynl1         | dynein light chain LC8-type 1                                        | 0.928571428571428    | protein coding gene      | 5   | -      | 115297110 | 115300999 | ENSMUG000000009013 | 96455          |
| Erc3          | excision repair cross-complementing rodent repair deficiency, comple | 0.928571428571428    | protein coding gene      | 18  | +      | 32240300  | 32270151  | ENSMUG000000024382 | 13872          |
| Gpr149        | G protein-coupled receptor 149                                       | 0.928571428571428    | protein coding gene      | 3   | -      | 62529077  | 62605140  | ENSMUG000000043441 | 229357         |
| Tram11        | translocation associated membrane protein 1-like 1                   | 0.928571428571428    | protein coding gene      | 3   | +      | 124320855 | 124324743 | ENSMUG000000044528 | 229801         |
| Kprp          | keratinocyte expressed, proline-rich                                 | 0.922172221673209    | protein coding gene      | 3   | -      | 92823074  | 92827247  | ENSMUG000000059832 | 433619         |
| Mrgprb1       | MAS-related GPR, member B1                                           | 0.91322320977314     | protein coding gene      | 7   | -      | 48444113  | 48456342  | ENSMUG000000070547 | 233231         |
| Ptpr          | protein tyrosine phosphatase, receptor type, R                       | 0.91322320977314     | protein coding gene      | 10  | +      | 116018213 | 116274932 | ENSMUG000000020151 | 19279          |
| Bst12         | Bardet-Biedl syndrome 12 (human)                                     | 0.904761904761905    | protein coding gene      | 3   | +      | 37312554  | 37321453  | ENSMUG000000014144 | 241950         |
| Hdac1         | histone deacetylase 1                                                | 0.904761904761905    | protein coding gene      | 4   | -      | 129516104 | 129542713 | ENSMUG000000028800 | 433759         |
| Iqcc          | IQ motif containing C                                                | 0.904761904761905    | protein coding gene      | 4   | -      | 129615126 | 129619099 | ENSMUG000000047200 | 230767         |
| Mis18bp1      | MIS18 binding protein 1                                              | 0.904761904761905    | protein coding gene      | 12  | -      | 65132734  | 65172604  | ENSMUG000000047534 | 217653         |
| Moap1         | modulator of apoptosis 1                                             | 0.904761904761905    | protein coding gene      | 12  | -      | 102742230 | 102743661 | ENSMUG000000096458 | 64113          |
| Papola        | poly (A) polymerase alpha                                            | 0.904761904761905    | protein coding gene      | 12  | +      | 105784694 | 105838944 | ENSMUG000000021111 | 18789          |
| Sfn4          | sideroflexin 4                                                       | 0.904761904761905    | protein coding gene      | 19  | -      | 60837277  | 60861479  | ENSMUG000000063698 | 94281          |
| Smu1          | smu-1 suppressor of mec-8 and unc-52 homolog (C. elegans)            | 0.904761904761905    | protein coding gene      | 4   | -      | 40736542  | 40757923  | ENSMUG000000028409 | 74255          |
| Sxm17         | sorting nexin 17                                                     | 0.904761904761905    | protein coding gene      | 5   | +      | 31193227  | 31199143  | ENSMUG000000029146 | 266781         |
| Tlxna         | taxilin alpha                                                        | 0.904761904761905    | protein coding gene      | 4   | -      | 129626083 | 129641065 | ENSMUG000000053841 | 109658         |
| Vcpkmt        | valosin containing protein lysine (K) methyltransferase              | 0.904761904761905    | protein coding gene      | 12  | -      | 69577628  | 69583028  | ENSMUG000000049882 | 207965         |
| Vrk1          | vaccinia related kinase 1                                            | 0.904761904761905    | protein coding gene      | 12  | +      | 106010228 | 106077426 | ENSMUG000000021115 | 22367          |
| Nesap         | neuroendocrine secretory protein antisense                           | 0.902707567477393    | antisense lincRNA gene   | 2   | -      | 174281237 | 174295436 | ENSMUG000000086537 | 56802          |
| Cdc8r         | colled-coll domain containing 87                                     | 0.898219696434944    | protein coding gene      | 19  | +      | 4839366   | 4842528   | ENSMUG000000067872 | 399599         |
| Hist1h4c      | histone cluster 1, H4c                                               | 0.88624343815111     | protein coding gene      | 13  | -      | 23698060  | 23698454  | ENSMUG000000060678 | 319155         |
| 0610038B21RIK | RIKEN cDNA 0610038B21 gene                                           | 0.880952380952381    | antisense lincRNA gene   | 8   | +      | 77517056  | 77518578  | ENSMUG000000097882 | 70345          |
| Bic12         | biogenesis of lysosomal organelles complex-1, subunit 2              | 0.880952380952381    | protein coding gene      | 19  | -      | 44139266  | 44146446  | ENSMUG000000057506 | 73689          |
| Cacna2d1      | calcium channel, voltage-dependent, alpha2/delta subunit 1           | 0.880952380952381    | protein coding gene      | 5   | +      | 15934788  | 16374504  | ENSMUG000000040118 | 12293          |
| Cd1d7         | CD1d7 antigen                                                        | 0.880952380952381    | polymorphic pseudogene   | 3   | +      | 8696551   | 86989780  | ENSMUG000000041750 | 12480          |
| Cdk5r1        | cyclin-dependent kinase 5, regulatory subunit 1 (p35)                | 0.880952380952381    | protein coding gene      | 11  | +      | 80477023  | 80481184  | ENSMUG000000048895 | 12569          |
| Centr2        | centrin 2                                                            | 0.880952380952381    | protein coding gene      | X   | -      | 72913532  | 72918411  | ENSMUG000000031347 | 26370          |
| Cpsf2         | cleavage and polyadenylation specific factor 2                       | 0.880952380952381    | protein coding gene      | 12  | +      | 101975764 | 102005993 | ENSMUG000000041781 | 51786          |
| 0430020I02RIK | RIKEN cDNA 0430020I02 gene                                           | 0.880952380952381    | ctlonal promoter lincRNA | 12  | -      | 116401947 | 116405161 | ENSMUG00000012980  | 11985          |
| Grik2         | glutamate receptor, ionotropic, kainate 2 (beta 2)                   | 0.880952380952381    | protein coding gene      | 10  | -      | 49099460  | 49788766  | ENSMUG000000056073 | 14806          |
| Methyl6       | methyltransferase like 6                                             | 0.880952380952381    | protein coding gene      | 14  | -      | 31473578  | 31495040  | ENSMUG00000001891  | 67011          |
| Neu3          | neuraminidase 3                                                      | 0.880952380952381    | protein coding gene      | 7   | -      | 99811439  | 99828417  | ENSMUG000000035239 | 50877          |
| Pcb2          | pterin 4 alpha carbinolamine dehydratase/dimerization cofactor of he | 0.880952380952381    | protein coding gene      | 13  | +      | 55727368  | 55776830  | ENSMUG000000021496 | 72562          |
| Phtf1         | putative homeodomain transcription factor 1                          | 0.880952380952381    | protein coding gene      | 3   | +      | 103968110 | 104024598 | ENSMUG000000058388 | 18685          |
| Serpina3h     | serine (or cysteine) peptidase inhibitor, clade A, member 3H         | 0.880952380952381    | pseudogene               | 12  | +      | 104274905 | 104253669 | ENSMUG000000041489 | 546546         |
| Stsia2        | ST8 alpha-N-acetylneuraminidase alpha-2,8-sialyltransferase 2        | 0.880952380952381    | protein coding gene      | 7   | -      | 73939119  | 74013690  | ENSMUG000000025789 | 20450          |
| Tomn5         | translocase of outer mitochondrial membrane 5                        | 0.880952380952381    | protein coding gene      | 4   | -      | 45105208  | 45108114  | ENSMUG000000078713 | 68512          |
| Wdr8          | 0.880952380952381                                                    | 0.880952380952381    | protein coding gene      | 4   | -      | 121059237 | 121098241 | ENSMUG000000043207 | 230709         |
| Zmpt24        | zinc metalloproteinase, STE24                                        | 0.880952380952381    | protein coding gene      | 4   | -      | 112247948 | 112259291 | ENSMUG000000041358 | 213765         |
| Nut1          | NUT midline carcinoma, family member 1                               | 0.87831006565368     | protein coding gene      | 2   | -      | 91250763  | 91400785  | ENSMUG000000008489 | 15569          |
| Elav2l        | ELAV like RNA binding protein 1                                      | 0.87287156094397     | protein coding gene      | 4   | -      | 29143839  | 29199630  | ENSMUG000000038916 | 67412          |
| Soga3         | SOGA family member 3                                                 | 0.87287156094397     | protein coding gene      | 10  | +      | 29143839  | 29199630  | ENSMUG000000038916 | 67412          |
| Cyp21a1       | cytochrome P450, family 21, subfamily a, polypeptide 1               | -0.87831006565368    | protein coding gene      | 17  | -      | 34801348  | 34804561  | ENSMUG000000024365 | 13079          |
| Dlx1as        | distal-less homeobox 1, antisense                                    | -0.87831006565368    | antisense lincRNA gene   | 2   | -      | 71516454  | 71537891  | ENSMUG000000084946 | 111970         |
| Lrrc66        | leucine rich repeat containing 66                                    | -0.87831006565368    | protein coding gene      | 5   | -      | 73606642  | 73632526  | ENSMUG000000067206 | 231296         |
| Aak1          | AP2 associated kinase 1                                              | -0.880952380952381   | protein coding gene      | 6   | +      | 86849517  | 87003223  | ENSMUG000000057230 | 269774         |
| Actg2         | actin, gamma 2, smooth muscle, enteric                               | -0.880952380952381   | protein coding gene      | 6   | -      | 83512905  | 83536265  | ENSMUG000000059430 | 11468          |
| Brdw3         | bromodomain and WD repeat domain containing 3                        | -0.880952380952381   | protein coding gene      | X   | -      | 108737016 | 108834372 | ENSMUG000000063663 | 382236         |
| Cacnb1        | calcium channel, voltage-dependent, beta 1 subunit                   | -0.880952380952381   | protein coding gene      | 11  | -      | 98001508  | 98023034  | ENSMUG000000020882 | 12295          |
| Casq1         | caseinestrin 1                                                       | -0.880952380952381   | protein coding gene      | 1   | -      | 172209894 | 172219868 | ENSMUG000000007122 | 12372          |
| Cdk18         | cyclin-dependent kinase 18                                           | -0.880952380952381   | protein coding gene      | 1   | -      | 132112237 | 132139684 | ENSMUG000000026437 | 18557          |
| Ceacam19      | carcinoembryonic antigen-related cell adhesion molecule 19           | -0.880952380952381   | protein coding gene      | 7   | -      | 19875742  | 19887965  | ENSMUG000000049848 | 319390         |
| Dusp11        | dual specificity phosphatase 11 (RNA/RNP complex 1-interacting)      | -0.880952380952381   | protein coding gene      | 6   | -      | 85942268  | 85961667  | ENSMUG000000030002 | 72102          |
| Fbx3          | F-box and leucine-rich repeat protein 3                              | -0.880952380952381   | protein coding gene      | 14  | -      | 103080239 | 103099566 | ENSMUG000000021214 | 50789          |
| Ipk6k2        | inositol hexaphosphate kinase 2                                      | -0.880952380952381   | protein coding gene      | 9   | +      | 108783796 | 108806337 | ENSMUG000000032599 | 76500          |
| Klf1          | Kruppel-like factor 1 (erythroid)                                    | -0.880952380952381   | protein coding gene      | 8   | +      | 84901928  | 84905291  | ENSMUG000000054191 | 16596          |
| Kmt2e         | lysine (K)-specific methyltransferase 2E                             | -0.880952380952381   | protein coding gene      | 5   | +      | 24344441  | 24350425  | ENSMUG000000029004 | 69188          |
| Ltbp3         | latent transforming growth factor beta binding protein 3             | -0.880952380952381   | protein coding gene      | 19  | +      | 5740904   | 5758532   | ENSMUG000000024940 | 16998          |
| Mprl14        | mitochondrial ribosomal protein L14                                  | -0.880952380952381   | protein coding gene      | 17  | +      | 45686322  | 45698495  | ENSMUG000000023939 | 68463          |
| Ndfip2        | Nedd4 family interacting protein 2                                   | -0.880952380952381   | protein coding gene      | 14  | +      | 10525873  | 105309298 | ENSMUG000000053253 | 76273          |
| Ndufa4l2      | NADH dehydrogenase (ubiquinone) 1 alpha subcomplex, 4-like 2         | -0.880952380952381   | protein coding gene      | 10  | +      | 127514967 | 127517154 | ENSMUG000000040280 | 407790         |
| Ntrk3         | neurotrophic tyrosine kinase, receptor, type 3                       | -0.880952380952381   | protein coding gene      | 7   | -      | 78179599  | 78738012  | ENSMUG000000059146 | 18213          |
| Pipn11        | protein tyrosine phosphatase, non-receptor type 11                   | -0.880952380952381   | protein coding gene      | 5   | -      | 121130533 | 121191397 | ENSMUG000000043733 | 19247          |
| Rbm20         | RNA binding motif protein 20                                         | -0.880952380952381   | protein coding gene      | 19  | +      | 53677306  | 53867080  | ENSMUG000000043639 | 73713          |
| Slc25a43      | solute carrier family 25, member 43                                  | -0.880952380952381   | protein coding gene      | X   | +      | 36743659  | 36777202  | ENSMUG000000037636 | 194744         |
| Zfp467        | zinc finger protein 467                                              | -0.880952380952381   | protein coding gene      | 6   | -      | 48427697  | 48448425  | ENSMUG000000066531 | 68910          |
| EphA8         | Eph receptor A8                                                      | -0.88786006505722    | protein coding gene      | 4   | -      | 136929419 | 136956816 | ENSMUG000000028661 | 13842          |
| Famil109a     | family with sequence similarity 109, member A                        | -0.904761904761905   | protein coding gene      | 5   | +      | 121848984 | 121854632 | ENSMUG000000044134 | 231717         |
| Ith2          | inter-alpha trypsin inhibitor, heavy chain 2                         | -0.904761904761905   | protein coding gene      | 2   | -      | 10094593  | 10131396  | ENSMUG000000037254 | 16425          |
| Kcnj8         | potassium inwardly-rectifying channel, subfamily J, member 8         | -0.904761904761905   | protein coding gene      | 6   | -      | 142564837 | 142571614 | ENSMUG000000030247 | 16523          |
| Lamb2         | laminin, beta 2                                                      | -0.904761904761905   | protein coding gene      | 9   | +      | 108479736 | 108490530 | ENSMUG000000052911 | 16779          |
| Mxd1          | MAX dimerization protein 1                                           | -0.904761904761905   | protein coding gene      | 6   | -      | 86647042  | 86669161  | ENSMUG000000001156 | 17119          |
| Plec1         | phospholipase C, epsilon 1                                           | -0.904761904761905   | protein coding gene      | 19  | +      | 38481109  | 38785030  | ENSMUG000000024998 | 74055          |
| Sbds          | SBD5 ribosome maturation factor                                      | -0.904761904761905   | protein coding gene      | 5   |        |           |           |                    |                |

**Supplementary Table 2.** List of enriched GO terms

| GO ID      | Pathway                                          | FDR      | Genes                                                                                                                                                                                                                                                                                                                                                                                                                                                                                                                   | Count |
|------------|--------------------------------------------------|----------|-------------------------------------------------------------------------------------------------------------------------------------------------------------------------------------------------------------------------------------------------------------------------------------------------------------------------------------------------------------------------------------------------------------------------------------------------------------------------------------------------------------------------|-------|
| GO.0006383 | transcription from RNA polymerase III promoter   | 1.83E-19 | Crcp, Polr1c, Polr1d, Polr2e, Polr2f, Polr2h, Polr3b, Polr3c, Polr3d, Polr3e, Polr3f, Polr3h, Polr3k, Tbp                                                                                                                                                                                                                                                                                                                                                                                                               | 14    |
| GO.0006366 | transcription from RNA polymerase I promoter     | 1.98E-14 | Gtf2h5, Polr1a, Polr1b, Polr1c, Polr1d, Polr1e, Polr2e, Polr2f, Polr2h, Twistnb, Znr1                                                                                                                                                                                                                                                                                                                                                                                                                                   | 11    |
| GO.0016076 | RNA metabolic process                            | 4.05E-13 | Chd2, Cpsf1, Cpsf3, Cpsf4, Crcp, Cstf1, Cstf2, Ctnnb1, Cux1, Dmrt2, Dusp11, Dynll1, Ercc2, Ercc3, Fip111, Gfi1b, Gtf2a2, Gtf2b, Gtf2e1, Gtf2e2, Gtf2h3, Gtf2h4, Gtf2h5, Hdac1, Klf1, Mll2, Mll5, Mnat1, Mxd1, Papola, Phtf1, Polr1a, Polr1b, Polr1c, Polr1d, Polr1e, Polr2e, Polr2f, Polr2h, Polr3b, Polr3c, Polr3d, Polr3e, Polr3f, Polr3h, Polr3k, Ppih, Prpf4, Rbm20, Sbds, Setd2, Sin3a, Taf1, Taf7, Twistnb, Wdr33, Zfp467, Znr1, Zxdc                                                                             | 59    |
| GO.0010467 | gene expression                                  | 3.11E-12 | Chd2, Cpsf1, Cpsf3, Cpsf4, Crcp, Cstf1, Cstf2, Ctnnb1, Cux1, Dmrt2, Dynll1, Ercc2, Ercc3, Fip111, Gfi1b, Gtf2a2, Gtf2b, Gtf2e1, Gtf2e2, Gtf2h3, Gtf2h4, Gtf2h5, Hdac1, Klf1, Mll2, Mll5, Mnat1, Mrpl14, Mrpl15, Mxd1, Papola, Phtf1, Polr1a, Polr1b, Polr1c, Polr1d, Polr1e, Polr2e, Polr2f, Polr2h, Polr3b, Polr3c, Polr3d, Polr3e, Polr3f, Polr3h, Polr3k, Ppih, Prpf4, Rbm20, Sbds, Setd2, Sin3a, Taf1, Taf7, Twistnb, Wdr33, Zfp467, Zmpste24, Znr1, Zxdc                                                           | 61    |
| GO.0006133 | nucleobase-containing compound metabolic process | 7.52E-12 | Cetn2, Chd2, Cps1, Cpsf1, Cpsf3, Cpsf4, Crcp, Cstf1, Cstf2, Ctnnb1, Cux1, Dmrt2, Dusp11, Dynll1, Ercc2, Ercc3, Fip111, Gfi1b, Gfpt1, Gtf2a2, Gtf2b, Gtf2e1, Gtf2e2, Gtf2h3, Gtf2h5, Hdac1, Klf1, Mll2, Mll5, Mnat1, Mxd1, Ndufv2, Papola, Phtf1, Polr1a, Polr1b, Polr1c, Polr1d, Polr1e, Polr2e, Polr2f, Polr2h, Polr3b, Polr3c, Polr3d, Polr3e, Polr3f, Polr3h, Polr3k, Ppih, Prpf4, Rbm20, Sbds, Setd2, Sin3a, Taf1, Taf7, Twistnb, Wdr33, Xpc, Zfp467, Znr1, Zxdc                                                    | 65    |
| GO.0034641 | cellular nitrogen compound metabolic process     | 7.6E-12  | Cetn2, Chd2, Cps1, Cpsf1, Cpsf3, Cpsf4, Crcp, Cstf1, Cstf2, Ctnnb1, Cux1, Dmrt2, Dusp11, Dynll1, Ercc2, Ercc3, Fip111, Gfi1b, Gfpt1, Gtf2a2, Gtf2b, Gtf2e1, Gtf2e2, Gtf2h3, Gtf2h5, Hdac1, Klf1, Mll2, Mll5, Mnat1, Mxd1, Ndufv2, Papola, Phtf1, Polr1a, Polr1b, Polr1c, Polr1d, Polr1e, Polr2e, Polr2f, Polr2h, Polr3b, Polr3c, Polr3d, Polr3e, Polr3f, Polr3h, Polr3k, Ppih, Prpf4, Rbm20, Sbds, Setd2, Sin3a, Taf1, Taf7, Twistnb, Wdr33, Xpc, Zfp467, Znr1, Zxdc                                                    | 70    |
| GO.0006725 | cellular aromatic compound metabolic process     | 8.94E-12 | Cetn2, Chd2, Cps1, Cpsf1, Cpsf3, Cpsf4, Crcp, Cstf1, Cstf2, Ctnnb1, Cux1, Dmrt2, Dusp11, Dynll1, Ercc2, Ercc3, Fip111, Gfi1b, Gfpt1, Gtf2a2, Gtf2b, Gtf2e1, Gtf2e2, Gtf2h3, Gtf2h5, Hdac1, Klf1, Mll2, Mll5, Mnat1, Mxd1, Ndufv2, Papola, Pcbd2, Phtf1, Polr1a, Polr1b, Polr1c, Polr1d, Polr1e, Polr2e, Polr2f, Polr2h, Polr3b, Polr3c, Polr3d, Polr3e, Polr3f, Polr3h, Polr3k, Ppih, Prpf4, Rbm20, Sbds, Setd2, Sin3a, Taf1, Taf7, Twistnb, Wdr33, Xpc, Zfp467, Znr1, Zxdc                                             | 66    |
| GO.0046483 | heterocycle metabolic process                    | 8.94E-12 | Cetn2, Chd2, Cps1, Cpsf1, Cpsf3, Cpsf4, Crcp, Cstf1, Cstf2, Ctnnb1, Cux1, Dmrt2, Dusp11, Dynll1, Ercc2, Ercc3, Fip111, Gfi1b, Gfpt1, Gtf2a2, Gtf2b, Gtf2e1, Gtf2e2, Gtf2h3, Gtf2h5, Hdac1, Klf1, Mll2, Mll5, Mnat1, Mxd1, Ndufv2, Papola, Pcbd2, Phtf1, Polr1a, Polr1b, Polr1c, Polr1d, Polr1e, Polr2e, Polr2f, Polr2h, Polr3b, Polr3c, Polr3d, Polr3e, Polr3f, Polr3h, Polr3k, Ppih, Prpf4, Rbm20, Sbds, Setd2, Sin3a, Taf1, Taf7, Twistnb, Wdr33, Xpc, Zfp467, Znr1, Zxdc                                             | 66    |
| GO.1901366 | organic cyclic compound metabolic process        | 8.94E-12 | Baat, Cetn2, Chd2, Cps1, Cpsf1, Cpsf3, Cpsf4, Crcp, Cstf1, Cstf2, Ctnnb1, Cux1, Cyp21a1, Dmrt2, Dusp11, Dynll1, Ercc2, Ercc3, Fip111, Gfi1b, Gfpt1, Gtf2a2, Gtf2b, Gtf2e1, Gtf2e2, Gtf2h3, Gtf2h5, Hdac1, Klf1, Mll2, Mll5, Mnat1, Mxd1, Ndufv2, Papola, Pcbd2, Phtf1, Polr1a, Polr1b, Polr1c, Polr1d, Polr1e, Polr2e, Polr2f, Polr2h, Polr3b, Polr3c, Polr3d, Polr3e, Polr3f, Polr3h, Polr3k, Ppih, Prpf4, Rbm20, Sbds, Setd2, Sin3a, Taf1, Taf7, Twistnb, Wdr33, Xpc, Zfp467, Znr1, Zxdc                              | 68    |
| GO.0006807 | nitrogen compound metabolic process              | 9.01E-12 | Baat, Cetn2, Chd2, Cps1, Cpsf1, Cpsf3, Cpsf4, Crcp, Cstf1, Cstf2, Ctnnb1, Cux1, Dmrt2, Dusp11, Dynll1, Ercc2, Ercc3, Fip111, Gfi1b, Gfpt1, Gtf2a2, Gtf2b, Gtf2e1, Gtf2e2, Gtf2h3, Gtf2h5, Hdac1, Itih2, Klf1, Mll2, Mll5, Mnat1, Mrpl14, Mrpl15, Mxd1, Ndufv2, Neu3, Papola, Pcbd2, Phtf1, Polr1a, Polr1b, Polr1c, Polr1d, Polr1e, Polr2e, Polr2f, Polr2h, Polr3b, Polr3c, Polr3d, Polr3e, Polr3f, Polr3h, Polr3k, Ppih, Prpf4, Rbm20, Sbds, Setd2, Sin3a, St8sia2, Taf1, Taf7, Twistnb, Wdr33, Xpc, Zfp467, Znr1, Zxdc | 72    |
| GO.0090304 | nucleic acid metabolic process                   | 1.28E-11 | Chd2, Crcp, Ctnnb1, Cux1, Dmrt2, Dynll1, Ercc2, Ercc3, Gfi1b, Gfpt1, Gtf2a2, Gtf2b, Gtf2e1, Gtf2e2, Gtf2h3, Gtf2h5, Hdac1, Klf1, Mll2, Mll5, Mnat1, Mxd1, Papola, Phtf1, Polr1a, Polr1b, Polr1c, Polr1d, Polr1e, Polr2e, Polr2f, Polr2h, Polr3b, Polr3c, Polr3d, Polr3e, Polr3f, Polr3h, Polr3k, Ppih, Prpf4, Rbm20, Sbds, Setd2, Sin3a, Taf1, Taf7, Twistnb, Wdr33, Xpc, Zfp467, Znr1, Zxdc                                                                                                                            | 60    |
| GO.0006351 | transcription, DNA-templated                     | 1.14E-10 | Chd2, Crcp, Ctnnb1, Cux1, Dmrt2, Dynll1, Ercc2, Ercc3, Gfi1b, Gfpt1, Gtf2a2, Gtf2b, Gtf2e1, Gtf2e2, Gtf2h3, Gtf2h5, Hdac1, Klf1, Mll2, Mll5, Mnat1, Mxd1, Phtf1, Polr1a, Polr1b, Polr1c, Polr1d, Polr1e, Polr2e, Polr2f, Polr2h, Polr3b, Polr3c, Polr3d, Polr3e, Polr3f, Polr3h, Polr3k, Setd2, Sin3a, Taf1, Taf7, Twistnb, Zfp467, Znr1, Zxdc                                                                                                                                                                          | 46    |
| GO.1901362 | organic cyclic compound biosynthetic process     | 1.16E-10 | Baat, Chd2, Cps1, Crcp, Ctnnb1, Cux1, Cyp21a1, Dmrt2, Dynll1, Ercc2, Ercc3, Gfi1b, Gfpt1, Gtf2a2, Gtf2b, Gtf2e1, Gtf2e2, Gtf2h3, Gtf2h5, Hdac1, Klf1, Mll2, Mll5, Mnat1, Mxd1, Pcbd2, Phtf1, Polr1a, Polr1b, Polr1c, Polr1d, Polr1e, Polr2e, Polr2f, Polr2h, Polr3b, Polr3c, Polr3d, Polr3e, Polr3f, Polr3h, Polr3k, Setd2, Sin3a, Taf1, Taf7, Twistnb, Zfp467, Znr1, Zxdc                                                                                                                                              | 51    |
| GO.0018133 | heterocycle biosynthetic process                 | 2.79E-10 | Chd2, Cps1, Crcp, Ctnnb1, Cux1, Dmrt2, Dynll1, Ercc2, Ercc3, Gfi1b, Gfpt1, Gtf2a2, Gtf2b, Gtf2e1, Gtf2e2, Gtf2h3, Gtf2h4, Gtf2h5, Hdac1, Klf1, Mll2, Mll5, Mnat1, Mxd1, Pcbd2, Phtf1, Polr1a, Polr1b, Polr1c, Polr1d, Polr1e, Polr2e, Polr2f, Polr2h, Polr3b, Polr3c, Polr3d, Polr3e, Polr3f, Polr3h, Polr3k, Setd2, Sin3a, Taf1, Taf7, Twistnb, Zfp467, Znr1, Zxdc                                                                                                                                                     | 49    |
| GO.0006352 | DNA-templated transcription, initiation          | 2.97E-10 | Crcp, Gtf2a1, Gtf2a2, Gtf2b, Gtf2e1, Gtf2e2, Polr1e, Polr3h, Taf1, Taf7, Tbp                                                                                                                                                                                                                                                                                                                                                                                                                                            | 11    |
| GO.0019438 | aromatic compound biosynthetic process           | 2.97E-10 | Cad, Chd2, Crcp, Ctnnb1, Cux1, Dmrt2, Dynll1, Ercc2, Ercc3, Gfi1b, Gfpt1, Gtf2a2, Gtf2b, Gtf2e1, Gtf2e2, Gtf2h3, Gtf2h4, Gtf2h5, Hdac1, Klf1, Mll2, Mll5, Mnat1, Mxd1, Pcbd2, Phtf1, Polr1a, Polr1b, Polr1c, Polr1d, Polr1e, Polr2e, Polr2f, Polr2h, Polr3b, Polr3c, Polr3d, Polr3e, Polr3f, Polr3h, Polr3k, Setd2, Sin3a, Taf1, Taf7, Twistnb, Zfp467, Znr1, Zxdc                                                                                                                                                      | 49    |

| GO ID      | Pathway                                             | FDR      | Genes                                                                                                                                                                                                                                                                                                                                                                                                                                                                                                                                                                                                                                                                    | Count |
|------------|-----------------------------------------------------|----------|--------------------------------------------------------------------------------------------------------------------------------------------------------------------------------------------------------------------------------------------------------------------------------------------------------------------------------------------------------------------------------------------------------------------------------------------------------------------------------------------------------------------------------------------------------------------------------------------------------------------------------------------------------------------------|-------|
| GO.0034654 | nucleobase-containing compound biosynthetic process | 3.28E-10 | Cad, Chd2, Crpc, Cttnb1, Cux1, Dmrt2, Dynll1, Ercc2, Ercc3, Gfi1b, Gfpt1, Gtf2a2, Gtf2b, Gtf2e1, Gtf2e2, Gtf2h3, Gtf2h4, Gtf2h5, Hdac1, Klf1, Mll2, Mll5, Mnat1, Mxd1, Phtf1, Polr1a, Polr1b, Polr1c, Polr1d, Polr1e, Polr2e, Polr2f, Polr2h, Polr3b, Polr3c, Polr3d, Polr3e, Polr3f, Polr3h, Polr3k, Setd2, Sin3a, Taf1, Taf7, Twistnb, Zfp467, Znr1, Zxdc                                                                                                                                                                                                                                                                                                              | 48    |
| GO.0044271 | cellular nitrogen compound biosynthetic process     | 8.79E-10 | Chd2, Cps1, Crpc, Cttnb1, Cux1, Dmrt2, Dynll1, Ercc2, Ercc3, Gfi1b, Gfpt1, Gtf2a2, Gtf2b, Gtf2e1, Gtf2e2, Gtf2h3, Gtf2h4, Gtf2h5, Hdac1, Klf1, Mll2, Mll5, Mnat1, Mrpl14, Mrpl15, Mxd1, Pcbd2, Phtf1, Polr1a, Polr1b, Polr1c, Polr1d, Polr1e, Polr2e, Polr2f, Polr2h, Polr3b, Polr3c, Polr3d, Polr3e, Polr3f, Polr3h, Polr3k, Setd2, Sin3a, St8sia2, Taf1, Taf7, Twistnb, Zfp467,                                                                                                                                                                                                                                                                                        | 52    |
| GO.0000183 | chromatin silencing at rDNA                         | 8.92E-09 | Hdac1, Polr1a, Polr1b, Polr1c, Polr1d, Polr1e, Sin3a, Znr1                                                                                                                                                                                                                                                                                                                                                                                                                                                                                                                                                                                                               | 8     |
| GO.0006342 | chromatin silencing                                 | 1.09E-08 | Hdac1, Mll2, Polr1a, Polr1b, Polr1c, Polr1d, Polr1e, Sin3a, Znr1                                                                                                                                                                                                                                                                                                                                                                                                                                                                                                                                                                                                         | 9     |
| GO.0044266 | cellular macromolecule metabolic process            | 2.52E-08 | Aak1, B2m, Cad, Cdk18, Cetn2, Chd2, Cps1, Cpsf1, Cpsf3, Cpsf4, Crpc, Cstf1, Cstf2, Cttnb1, Cux1, Dmrt2, Dusp13, Dynll1, Epha8, Fam109a, Fbxl3, Fip111, Gab1, Gfi1b, Grb2, Gtf2a2, Gtf2b, Gtf2e1, Gtf2e2, Gtf2h5, Hdac1, Klf1, Mettl21d, Mll2, Mll5, Mrpl14, Mrpl15, Mxd1, Ndufab1, Ntrk3, Papola, Phtf1, Polr1a, Polr1b, Polr1c, Polr1d, Polr1e, Polr2e, Polr2f, Polr2h, Polr3b, Polr3c, Polr3d, Polr3e, Polr3f, Polr3h, Polr3k, Ppih, Ppp4c, Prpf4, Ptpn11, Ptpr, Rbm20, Sbds, Setd2, Sin3a, St8sia2, Taf7, Twistnb, Vrk1, Wdr33, Xpc                                                                                                                                   | 75    |
| GO.0008152 | metabolic process                                   | 1.26E-07 | Aak1, Arl1, B2m, Baat, Cdk18, Cetn2, Chd2, Cps1, Cpsf3, Cpsf4, Crpc, Crhbp, Cstf1, Cstf2, Cttnb1, Cux1, Cyp21a1, Dmrt2, Duoxa1, Dusp13, Dynll1, Epha8, Fam109a, Fbxl3, Fip111, Gab1, Gfi1b, Gfpt1, Grb2, Gtf2a2, Gtf2b, Gtf2e1, Gtf2e2, Gtf2h5, Hdac1, Itih2, Klf1, Mettl21d, Mettl6, Mll2, Mll5, Mrpl14, Mrpl15, Mxd1, Nat6, Ndufa12, Ndufa13, Ndufa9, Ndufab1, Ndufb2, Ndufb5, Ndufb6, Ndufv2, Neu3, Ntrk3, Papola, Pcbd2, Phtf1, Plce1, Polr1a, Polr1b, Polr1c, Polr1d, Polr1e, Polr2e, Polr2f, Polr2h, Polr3b, Polr3c, Polr3d, Polr3e, Polr3f, Polr3h, Polr3k, Ppih, Ppp4c, Prpf4, Ptpn11, Ptpr, Rbm20, Sbds, Setd2, Sin3a, St8sia2, Taf7, Twistnb, Vrk1, Wdr33, Xpc | 94    |
| GO.0034645 | cellular macromolecule biosynthetic process         | 1.44E-07 | Chd2, Crpc, Cttnb1, Cux1, Dmrt2, Dynll1, Ercc2, Ercc3, Gfi1b, Gfpt1, Gtf2a2, Gtf2b, Gtf2e1, Gtf2e2, Gtf2h3, Gtf2h4, Gtf2h5, Hdac1, Klf1, Mll2, Mll5, Mnat1, Mrpl14, Mrpl15, Mxd1, Phtf1, Polr1a, Polr1b, Polr1c, Polr1d, Polr1e, Polr2e, Polr2f, Polr2h, Polr3b, Polr3c, Polr3d, Polr3e, Polr3f, Polr3h, Polr3k, Setd2, Sin3a, St8sia2, Taf1, Taf7, Twistnb, Zfp467, Znr1, Zxdc                                                                                                                                                                                                                                                                                          | 49    |
| GO.0044237 | cellular metabolic process                          | 2.4E-07  | Aak1, Arl1, B2m, Baat, Cdk18, Cetn2, Chd2, Cps1, Cpsf1, Cpsf3, Cpsf4, Crpc, Cstf1, Cstf2, Cttnb1, Cux1, Dmrt2, Duoxa1, Dusp13, Dynll1, Epha8, Fam109a, Fbxl3, Fip111, Gab1, Gfi1b, Gfpt1, Grb2, Gtf2a2, Gtf2b, Gtf2e1, Gtf2e2, Gtf2h5, Hdac1, Klf1, Mettl21d, Mll2, Mll5, Mrpl14, Mrpl15, Mxd1, Ndufa9, Ndufab1, Ndufv2, Neu3, Ntrk3, Papola, Pcbd2, Phtf1, Polr1a, Polr1b, Polr1c, Polr1d, Polr1e, Polr2e, Polr2f, Polr2h, Polr3b, Polr3c, Polr3d, Polr3e, Polr3f, Polr3h, Polr3k, Ppih, Ppp4c, Prpf4, Ptpn11, Ptpr, Rbm20, Sbds, Setd2, Sin3a, St8sia2, Taf7, Twistnb, Vrk1, Wdr33, Xpc                                                                                | 84    |
| GO.1901576 | organic substance biosynthetic process              | 2.45E-07 | Baat, Chd2, Cps1, Crpc, Cttnb1, Cux1, Cyp21a1, Dmrt2, Dynll1, Ercc2, Ercc3, Gfi1b, Gfpt1, Gtf2a2, Gtf2b, Gtf2e1, Gtf2e2, Gtf2h3, Gtf2h4, Gtf2h5, Hdac1, Klf1, Mll2, Mll5, Mnat1, Mrpl14, Mrpl15, Mxd1, Ndufa9, Ndufab1, Pcbd2, Phtf1, Polr1a, Polr1b, Polr1c, Polr1d, Polr1e, Polr2e, Polr2f, Polr2h, Polr3b, Polr3c, Polr3d, Polr3e, Polr3f, Polr3h, Polr3k, Setd2, Sin3a, St8sia2, Taf1, Taf7, Twistnb, Zfp467, Znr1, Zxdc                                                                                                                                                                                                                                             | 56    |
| GO.0044244 | cellular biosynthetic process                       | 3.38E-07 | Baat, Chd2, Cps1, Crpc, Cttnb1, Cux1, Dmrt2, Dynll1, Ercc2, Ercc3, Gfi1b, Gfpt1, Gtf2a2, Gtf2b, Gtf2e1, Gtf2e2, Gtf2h3, Gtf2h4, Gtf2h5, Hdac1, Klf1, Mll2, Mll5, Mnat1, Mrpl14, Mrpl15, Mxd1, Ndufa9, Ndufab1, Pcbd2, Phtf1, Polr1a, Polr1b, Polr1c, Polr1d, Polr1e, Polr2e, Polr2f, Polr2h, Polr3b, Polr3c, Polr3d, Polr3e, Polr3f, Polr3h, Polr3k, Setd2, Sin3a, St8sia2, Taf1,                                                                                                                                                                                                                                                                                        | 55    |
| GO.0050785 | regulation of biological process                    | 3.41E-07 | Aak1, Actg2, Aipl1, Arhgef10l, B2m, Bbs12, Bloc1s2b, Brwd3, Cacna2d1, Caenb1, Cd1d2, Cdh2, Cdk18, Cdk5, Cdk5r1, Cetn2, Chd2, Cps1, Crpc, Crhbp, Cttnb1, Cux1, Dmrt2, Duoxa1, Dynll1, Epha8, Ercc2, Ercc3, Fam109a, Fbxl3, Gab1, Gfi1b, Gfpt1, Golga4, Gpr149, Grb2, Gtf2a1, Gtf2a2, Gtf2b, Gtf2e1, Gtf2e2, Gtf2h3, Gtf2h4, Gtf2h5, Hdac1, Ip6k2, Iqsec1, Itih2, Kcnj8, Klf1, Ltbp3, Mll2, Mll5, Mrgprb1, Mxd1, Myo1d, Ndfip2, Ndufa13, Papola, Pcbd2, Phtf1, Polr1a, Polr1b, Polr1c, Polr1d, Polr1e, Polr3b, Polr3c, Polr3d, Polr3f, Ppih, Ppp4c, Ptpn11, Ptpr, Rbm20, Sbds, Setd2, Sfxn4, Sin3a, Snnp25, Suv17, Soga2, Sfs2l1, Sfx1a, Suf1, Taf1, Tbp, Tuba1, Vrk1      | 94    |
| GO.0043176 | macromolecule metabolic process                     | 4.44E-07 | Aak1, B2m, Cad, Cdk18, Cetn2, Chd2, Cps1, Cpsf3, Cpsf4, Crpc, Cstf1, Cstf2, Cttnb1, Cux1, Dmrt2, Dusp13, Dynll1, Epha8, Fam109a, Fbxl3, Fip111, Gab1, Gfi1b, Grb2, Gtf2a2, Gtf2b, Gtf2e1, Gtf2e2, Gtf2h5, Hdac1, Itih2, Klf1, Mettl21d, Mll2, Mll5, Mrpl14, Mrpl15, Mxd1, Ndufab1, Ntrk3, Papola, Phtf1, Polr1a, Polr1b, Polr1c, Polr1d, Polr1e, Polr2e, Polr2f, Polr2h, Polr3b, Polr3c, Polr3d, Polr3e, Polr3f, Polr3h, Polr3k, Ppih, Ppp4c, Prpf4, Ptpn11, Ptpr, Rbm20, Sbds, Setd2, Sin3a, St8sia2, Taf7, Twistnb, Vrk1                                                                                                                                               | 76    |
| GO.0071704 | organic substance metabolic process                 | 5.65E-07 | Aak1, B2m, Baat, Cdk18, Cetn2, Chd2, Cps1, Cpsf3, Cpsf4, Crpc, Cstf1, Cstf2, Cttnb1, Cux1, Cyp21a1, Dmrt2, Dusp13, Dynll1, Epha8, Fam109a, Fbxl3, Fip111, Gab1, Gfi1b, Gfpt1, Grb2, Gtf2a2, Gtf2b, Gtf2e1, Gtf2e2, Gtf2h5, Hdac1, Ip6k2, Itih2, Klf1, Mettl21d, Mll2, Mll5, Mrpl14, Mrpl15, Mxd1, Ndufa9, Ndufab1, Ndufv2, Neu3, Ntrk3, Papola, Pcbd2, Phtf1, Plce1, Polr1a, Polr1b, Polr1c, Polr1d, Polr1e, Polr2e, Polr2f, Polr2h, Polr3b, Polr3c, Polr3d, Polr3e, Polr3f, Polr3h, Polr3k, Ppih, Ppp4c, Prpf4, Ptpn11, Ptpr, Rbm20, Sbds, Setd2, Sin3a, St8sia2, Taf7, Twistnb, Vrk1                                                                                   | 86    |
| GO.0040025 | regulation of gene expression, epigenetic           | 9.62E-06 | Cttnb1, Hdac1, Mll2, Mll5, Polr1a, Polr1b, Polr1c, Polr1d, Polr1e, Sin3a, Znr1                                                                                                                                                                                                                                                                                                                                                                                                                                                                                                                                                                                           | 11    |
| GO.0044238 | primary metabolic process                           | 1.23E-05 | Aak1, B2m, Baat, Cdk18, Cetn2, Chd2, Cps1, Cpsf3, Cpsf4, Crpc, Cstf1, Cstf2, Cttnb1, Cux1, Cyp21a1, Dmrt2, Dusp13, Dynll1, Epha8, Fbxl3, Fip111, Gab1, Gfi1b, Gfpt1, Gtf2a2, Gtf2b, Gtf2e1, Gtf2e2, Gtf2h5, Hdac1, Ip6k2, Klf1, Mettl21d, Mll2, Mll5, Mrpl14, Mrpl15, Mxd1, Ndufab1, Ndufv2, Neu3, Ntrk3, Papola, Phtf1, Plce1, Polr1a, Polr1b, Polr1c, Polr1d, Polr1e, Polr2e, Polr2f, Polr2h, Polr3b, Polr3c, Polr3d, Polr3e, Polr3f, Polr3h, Polr3k, Ppih, Ppp4c, Prpf4, Ptpn11, Ptpr, Rbm20, Sbds, Scrn3, Setd2, Sin3a, St8sia2, Taf7, Twistnb, Vrk1, Wdr33, Xpc, Zfp467, Znr1, Zxdc                                                                                 | 81    |
| GO.0006285 | nucleotide-excision repair                          | 2.09E-05 | Cetn2, Ercc2, Ercc3, Gtf2h3, Gtf2h4, Gtf2h5, Xpc                                                                                                                                                                                                                                                                                                                                                                                                                                                                                                                                                                                                                         | 7     |

| GO ID      | Pathway                                              | FDR      | Genes                                                                                                                                                                                                                                                                                                                                                                                                                                                                                                                                                                                                                                                                                                                                                                                                            | Count |
|------------|------------------------------------------------------|----------|------------------------------------------------------------------------------------------------------------------------------------------------------------------------------------------------------------------------------------------------------------------------------------------------------------------------------------------------------------------------------------------------------------------------------------------------------------------------------------------------------------------------------------------------------------------------------------------------------------------------------------------------------------------------------------------------------------------------------------------------------------------------------------------------------------------|-------|
| GO.0009987 | cellular process                                     | 2.89E-05 | Aak1, B2m, Baat, Bbs12, Bloc1s2b, Brwd3, Cacna2d1, Cacnb1, Casq1, Ccdc124, Ccdc66, Ccdc87, Cdh2, Cdk18, Cdk5r1, Cctn2, Chd2, Cpsf1, Cpsf3, Cpsf4, Crcp, Crhbp, Cstf1, Cstf2, Ctnnb1, Cux1, Dmrt2, Duoxa1, Dusp13, Epha8, Fam109a, Fbxl3, Fip111, Gab1, Gfi1b, Gfpt1, Golga4, Gpr149, Gtf2a2, Gtf2b, Gtf2e1, Gtf2e2, Gtf2h5, Hdac1, Iqsec1, Kcnj8, Klfl1, Lamb2, Ltbp3, Mett121d, Mis18bp1, Mll2, Mll5, Mrgprb1, Mrpl14, Mrpl15, Mxd1, Ndfip2, Ndufa13, Ndufa9, Ndufab1, Ndufv2, Neu3, Papola, Pcbd2, Phtf1, Polr1a, Polr1b, Polr1c, Polr1d, Polr1e, Polr2e, Polr2f, Polr2h, Polr3b, Polr3c, Polr3d, Polr3e, Polr3f, Polr3h, Polr3k, Ppih, Prpf4, Ptpn11, Rbm20, Sbds, Scrn3, Setd2, Sfxn4, Sin3a, Slc25a43, Snap25, Snx17, St8sia2, Syt1, Sfa211, Sxt1, Taf1, Tbp, Tbxlna, Vrk1, Xpc, Zfand5, Zfp467, Znr1, Zxdc | 108   |
| GO.0065007 | biological regulation                                | 4.38E-05 | Aak1, Actg2, Aipl1, Arhgef10l, Bbs12, Bloc1s2b, Brwd3, Cacna2d1, Cacnb1, Cad, Cd1d2, Cdh2, Cdk18, Cdk5, Cdk5r1, Cctn2, Chd2, Crcp, Crhbp, Ctnnb1, Cux1, Dmrt2, Duoxa1, Dynll1, Epha8, Ercc2, Ercc3, Fam109a, Fbxl3, Gab1, Gfi1b, Gfpt1, Golga4, Gpr149, Grb2, Gtf2a1, Gtf2a2, Gtf2b, Gtf2e1, Gtf2e2, Gtf2h3, Gtf2h4, Gtf2h5, Hdac1, Ip6k2, Iqsec1, Itih2, Klfl1, Ltbp3, Mll2, Mll5, Mrgprb1, Mxd1, Myo1d, Ndfip2, Ndufa13, Papola, Pcbd2, Phtf1, Polr1a, Polr1b, Polr1c, Polr1d, Polr1e, Polr3b, Polr3c, Polr3d, Polr3f, Ppih, Ppp4c, Ptpn11, Ptpr, Rbm20, Sbds, Setd2, Sfxn4, Sin3a, Snap25, Snx17, Soga3, Sfa211, Sxt1, Taf1, Tbp, Tbxlna, Vrk1, Xpc, Zfand5, Zfp467, Znr1, Zxdc                                                                                                                               | 91    |
| GO.0051252 | regulation of RNA metabolic process                  | 5.17E-05 | Bloc1s2b, Brwd3, Cdk5, Chd2, Ctnnb1, Cux1, Dmrt2, Dynll1, Ercc2, Ercc3, Gfi1b, Gtf2a1, Gtf2a2, Gtf2b, Gtf2e1, Gtf2e2, Gtf2h3, Gtf2h4, Gtf2h5, Hdac1, Klfl1, Mll2, Mll5, Mnat1, Mxd1, Ndufa13, Ntrk3, Papola, Pcbd2, Phtf1, Polr1a, Polr1b, Polr1c, Polr1d, Polr1e, Rbm20, Setd2, Sfxn4, Sin3a, Taf1,                                                                                                                                                                                                                                                                                                                                                                                                                                                                                                             | 44    |
| GO.0031323 | regulation of cellular metabolic process             | 6.9E-05  | Aipl1, Bloc1s2b, Brwd3, Cd1d2, Cdh2, Cdk5, Chd2, Ctnnb1, Cux1, Dmrt2, Duoxa1, Dynll1, Epha8, Ercc2, Ercc3, Gab1, Gfi1b, Grb2, Grik2, Gtf2a1, Gtf2a2, Gtf2b, Gtf2e1, Gtf2e2, Gtf2h3, Gtf2h4, Gtf2h5, Hdac1, Itih2, Klfl1, Mll2, Mll5, Mnat1, Mxd1, Myo1d, Ndfip2, Ndufa13, Papola, Pcbd2, Phtf1, Plce1, Polr1a, Polr1b, Polr1c, Polr1d, Polr1e, Ppp4c, Ptpn11, Ptpr, Rbm20, Setd2, Sfxn4, Sin3a, Soga3, Sfa211, Taf1, Tbp, Tbxlna, Zfp467, Znr1, Zxdc                                                                                                                                                                                                                                                                                                                                                             | 61    |
| GO.0051607 | defense response to virus                            | 6.97E-05 | Crcp, Kcnj8, Polr3b, Polr3c, Polr3d, Polr3e, Polr3f, Polr3h, Polr3k                                                                                                                                                                                                                                                                                                                                                                                                                                                                                                                                                                                                                                                                                                                                              | 9     |
| GO.0006366 | transcription from RNA polymerase II promoter        | 7.46E-05 | Cux1, Dmrt2, Ercc2, Ercc3, Gtf2a2, Gtf2e1, Gtf2e2, Gtf2h3, Gtf2h4, Mnat1, Polr2e, Polr2f, Polr2h, Setd2, Taf7, Tbp                                                                                                                                                                                                                                                                                                                                                                                                                                                                                                                                                                                                                                                                                               | 16    |
| GO.0019219 | regulation of nucleobase-containing compound metal   | 7.7E-05  | Aipl1, Bloc1s2b, Brwd3, Cdk5, Chd2, Ctnnb1, Cux1, Dmrt2, Dynll1, Ercc2, Ercc3, Gfi1b, Gtf2a1, Gtf2a2, Gtf2b, Gtf2e1, Gtf2e2, Gtf2h3, Gtf2h4, Gtf2h5, Hdac1, Klfl1, Mll2, Mll5, Mnat1, Mxd1, Ndufa13, Ntrk3, Papola, Pcbd2, Phtf1, Polr1a, Polr1b, Polr1c, Polr1d, Polr1e, Ppp4c, Rbm20, Setd2, Sfxn4, Sin3a, Taf1, Tbp, Zfp467, Znr1, Zxdc                                                                                                                                                                                                                                                                                                                                                                                                                                                                       | 46    |
| GO.0019222 | regulation of metabolic process                      | 9.85E-05 | Actg2, Aipl1, Arhgef10l, Arl1, Bloc1s2b, Brwd3, Cd1d2, Cdh2, Cdk5, Chd2, Ctnnb1, Cux1, Dmrt2, Duoxa1, Dynll1, Epha8, Ercc2, Ercc3, Gab1, Gfi1b, Gfpt1, Grb2, Grik2, Gtf2a1, Gtf2a2, Gtf2b, Gtf2e1, Gtf2e2, Gtf2h3, Gtf2h4, Gtf2h5, Hdac1, Iqsec1, Itih2, Klfl1, Mll2, Mll5, Mnat1, Mxd1, Myo1d, Ndfip2, Ndufa13, Papola, Pcbd2, Phtf1, Plce1, Polr1a, Polr1b, Polr1c, Polr1d, Polr1e, Ppp4c, Ptpn11, Ptpr, Rbm20, Setd2, Sfxn4, Sin3a, Soga3, Sfa211, Taf1, Tbp, Zfp467, Znr1, Zxdc                                                                                                                                                                                                                                                                                                                              | 66    |
| GO.0060255 | regulation of macromolecule metabolic process        | 0.000107 | Actg2, Bloc1s2b, Brwd3, Cd1d2, Cdh2, Cdk5, Chd2, Ctnnb1, Cux1, Dmrt2, Dynll1, Epha8, Ercc2, Ercc3, Gab1, Gfi1b, Gfpt1, Grb2, Grik2, Gtf2a1, Gtf2a2, Gtf2b, Gtf2e1, Gtf2e2, Gtf2h3, Gtf2h4, Gtf2h5, Hdac1, Itih2, Klfl1, Mll2, Mll5, Mnat1, Mxd1, Myo1d, Ndfip2, Ndufa13, Papola, Pcbd2, Phtf1, Plce1, Polr1a, Polr1b, Polr1c, Polr1d, Polr1e, Ppp4c, Ptpn11, Ptpr, Rbm20, Setd2, Sfxn4, Sin3a, Sfa211, Taf1, Tbp, Zfp467, Znr1, Zxdc                                                                                                                                                                                                                                                                                                                                                                             | 59    |
| GO.0080090 | regulation of primary metabolic process              | 0.000113 | Aipl1, Bloc1s2b, Brwd3, Cd1d2, Cdh2, Cdk5, Chd2, Ctnnb1, Cux1, Dmrt2, Duoxa1, Dynll1, Epha8, Ercc2, Ercc3, Gab1, Gfi1b, Grb2, Grik2, Gtf2a1, Gtf2a2, Gtf2b, Gtf2e1, Gtf2e2, Gtf2h3, Gtf2h4, Gtf2h5, Hdac1, Itih2, Klfl1, Mll2, Mll5, Mnat1, Mxd1, Myo1d, Ndfip2, Ndufa13, Papola, Pcbd2, Phtf1, Plce1, Polr1a, Polr1b, Polr1c, Polr1d, Polr1e, Ppp4c, Ptpn11, Ptpr, Rbm20, Setd2, Sfxn4, Sin3a, Sfa211, Taf1, Tbp, Zfp467, Znr1, Zxdc                                                                                                                                                                                                                                                                                                                                                                            | 59    |
| GO.0006355 | regulation of transcription, DNA-templated           | 0.000119 | Bloc1s2b, Brwd3, Cdk5, Chd2, Ctnnb1, Cux1, Dmrt2, Dynll1, Ercc2, Ercc3, Gfi1b, Gtf2a1, Gtf2a2, Gtf2b, Gtf2e1, Gtf2e2, Gtf2h3, Gtf2h4, Gtf2h5, Hdac1, Klfl1, Mll2, Mll5, Mnat1, Mxd1, Ndufa13, Ntrk3, Pcbd2, Phtf1, Polr1a, Polr1b, Polr1c, Polr1d, Polr1e, Setd2, Sfxn4, Sin3a, Taf1, Tbp, Zfp467,                                                                                                                                                                                                                                                                                                                                                                                                                                                                                                               | 42    |
| GO.0006378 | mRNA polyadenylation                                 | 0.000197 | Cpsf1, Cpsf2, Fip111, Papola, Wdr33                                                                                                                                                                                                                                                                                                                                                                                                                                                                                                                                                                                                                                                                                                                                                                              | 5     |
| GO.0051171 | regulation of nitrogen compound metabolic process    | 0.000198 | Aipl1, Bloc1s2b, Brwd3, Cdk5, Chd2, Ctnnb1, Cux1, Dmrt2, Duoxa1, Dynll1, Ercc2, Ercc3, Gfi1b, Gtf2a1, Gtf2a2, Gtf2b, Gtf2e1, Gtf2e2, Gtf2h3, Gtf2h4, Gtf2h5, Hdac1, Klfl1, Mll2, Mll5, Mnat1, Mxd1, Ndufa13, Ntrk3, Papola, Pcbd2, Phtf1, Polr1a, Polr1b, Polr1c, Polr1d, Polr1e, Ppp4c, Rbm20, Setd2, Sfxn4, Sin3a, Taf1, Tbp, Zfp467, Znr1, Zxdc                                                                                                                                                                                                                                                                                                                                                                                                                                                               | 47    |
| GO.0050794 | regulation of cellular process                       | 0.000201 | Aak1, Aipl1, Arl1, Bbs12, Bloc1s2b, Brwd3, Cacna2d1, Cacnb1, Cd1d2, Cdh2, Cdk18, Cdk5, Cdk5r1, Cctn2, Chd2, Crcp, Crhbp, Ctnnb1, Cux1, Dmrt2, Duoxa1, Dynll1, Epha8, Ercc2, Ercc3, Gab1, Gfi1b, Golga4, Gpr149, Grb2, Gtf2a1, Gtf2a2, Gtf2b, Gtf2e1, Gtf2e2, Gtf2h3, Gtf2h4, Gtf2h5, Hdac1, Ip6k2, Itih2, Kcnj8, Klfl1, Ltbp3, Mll2, Mll5, Mrgprb1, Mxd1, Myo1d, Ndfip2, Ndufa13, Papola, Pcbd2, Phtf1, Polr1a, Polr1b, Polr1c, Polr1d, Polr1e, Ppih, Ppp4c, Ptpn11, Ptpr, Rbm20, Sbds, Setd2, Sfxn4, Sin3a, Snap25, Snx17, Soga3, Sfa211, Sxt1, Taf1, Tbp, Tbxlna, Vrk1, Xpc, Zfand5, Zfp467                                                                                                                                                                                                                    | 83    |
| GO.0010468 | regulation of gene expression                        | 0.000407 | Actg2, Bloc1s2b, Brwd3, Cdk5, Chd2, Ctnnb1, Cux1, Dmrt2, Dynll1, Ercc2, Ercc3, Gfi1b, Gfpt1, Gtf2a1, Gtf2a2, Gtf2b, Gtf2e1, Gtf2e2, Gtf2h3, Gtf2h4, Gtf2h5, Hdac1, Klfl1, Mll2, Mll5, Mnat1, Mxd1, Ndfip2, Ndufa13, Papola, Pcbd2, Phtf1, Polr1a, Polr1b, Polr1c, Polr1d, Polr1e, Rbm20, Setd2, Sfxn4, Sin3a, Taf1, Tbp, Zfp467, Znr1, Zxdc                                                                                                                                                                                                                                                                                                                                                                                                                                                                      | 46    |
| GO.0031124 | mRNA 3'-end processing                               | 0.000488 | Cpsf1, Cpsf3, Fip111, Papola, Wdr33                                                                                                                                                                                                                                                                                                                                                                                                                                                                                                                                                                                                                                                                                                                                                                              | 5     |
| GO.0006367 | transcription initiation from RNA polymerase II prom | 0.000677 | Gtf2a1, Gtf2a2, Gtf2e1, Gtf2e2, Taf7                                                                                                                                                                                                                                                                                                                                                                                                                                                                                                                                                                                                                                                                                                                                                                             | 5     |

| GO ID      | Pathway                                             | FDR     | Genes                                                                                                                                                                                                                                                                                                                                                                                                                                                                                                                                                                                                                                                                                                                                                                                                                                                                                                                                                                                                                                                                                                                                                                                                                                                                                                                                                                                                                                                                                                                                                                        | Count |
|------------|-----------------------------------------------------|---------|------------------------------------------------------------------------------------------------------------------------------------------------------------------------------------------------------------------------------------------------------------------------------------------------------------------------------------------------------------------------------------------------------------------------------------------------------------------------------------------------------------------------------------------------------------------------------------------------------------------------------------------------------------------------------------------------------------------------------------------------------------------------------------------------------------------------------------------------------------------------------------------------------------------------------------------------------------------------------------------------------------------------------------------------------------------------------------------------------------------------------------------------------------------------------------------------------------------------------------------------------------------------------------------------------------------------------------------------------------------------------------------------------------------------------------------------------------------------------------------------------------------------------------------------------------------------------|-------|
| GO.0010556 | regulation of macromolecule biosynthetic process    | 0.00111 | Bloc1s2b, Brwd3, Cd1d2, Cdk5, Chd2, Cttnb1, Cux1, Dmrt2, Dynll1, Ercc2, Ercc3, Gfi1b, Gtf2a1, Gtf2a2, Gtf2b, Gtf2e1, Gtf2e2, Gtf2h3, Gtf2h4, Gtf2h5, Hdac1, Klf1, Mll2, Mll5, Mnat1, Mxd1, Ndufa13, Ntrk3, Pcbd2, Phtf1, Polr1a, Polr1b, Polr1c, Polr1d, Polr1e, Setd2, Sfxn4, Sin3a, Taf1, Tbp,                                                                                                                                                                                                                                                                                                                                                                                                                                                                                                                                                                                                                                                                                                                                                                                                                                                                                                                                                                                                                                                                                                                                                                                                                                                                             | 43    |
| GO.0008150 | biological_process                                  | 0.00232 | Aak1, Actg2, Arhgef10l, Bbs12, Bloc1s2b, Brwd3, Cacna2d1, Cacnb1, Ccdc124, Ccdc66, Ccdc87, Cd1d2, Cdh2, Cdk18, Cdk5r1, Cetrn2, Chd2, Cpsf1, Cpsf3, Cpsf4, Crep, Crhbp, Cstf1, Cstf2, Cttnb1, Cux1, Cyp21a1, Dmrt2, Duoxa1, Dusp13, Epha8, Fam109a, Fbxl3, Fip11l1, Gab1, Gfi1b, Gpr149, Gtf2a2, Gtf2b, Gtf2e1, Gtf2e2, Gtf2h5, Hdac1, Iqsec1, Itih2, Klf1, Lamb2, Ltbp3, Mettl21d, Mettl6, Mis18bp1, Mll2, Mll5, Mrgprb1, Mrpl14, Mrpl15, Mxd1, Nat6, Ndfip2, Ndufa13, Ndufab1, Ndufb2, Ndufb5, Ndufb6, Ndufv2, Neu3, Papola, Pcbd2, Phtf1, Polr1a, Polr1b, Polr1c, Polr1d, Polr1e, Polr2e, Polr2f, Polr2h, Polr3b, Polr3c, Polr3e, Polr3f, Polr3h, Polr3k, Ppih, Prpf4, Ptpn11, Rbm20, Sbds, Scrn3, Setd2, Sin3a, Slc25a43, Snap25, Suga3, Tbp, Tef, Tefl, Tefl2, Tefl3, Tefl4, Tefl5, Tefl6, Tefl7, Tefl8, Tefl9, Tefl10, Tefl11, Tefl12, Tefl13, Tefl14, Tefl15, Tefl16, Tefl17, Tefl18, Tefl19, Tefl20, Tefl21, Tefl22, Tefl23, Tefl24, Tefl25, Tefl26, Tefl27, Tefl28, Tefl29, Tefl30, Tefl31, Tefl32, Tefl33, Tefl34, Tefl35, Tefl36, Tefl37, Tefl38, Tefl39, Tefl40, Tefl41, Tefl42, Tefl43, Tefl44, Tefl45, Tefl46, Tefl47, Tefl48, Tefl49, Tefl50, Tefl51, Tefl52, Tefl53, Tefl54, Tefl55, Tefl56, Tefl57, Tefl58, Tefl59, Tefl60, Tefl61, Tefl62, Tefl63, Tefl64, Tefl65, Tefl66, Tefl67, Tefl68, Tefl69, Tefl70, Tefl71, Tefl72, Tefl73, Tefl74, Tefl75, Tefl76, Tefl77, Tefl78, Tefl79, Tefl80, Tefl81, Tefl82, Tefl83, Tefl84, Tefl85, Tefl86, Tefl87, Tefl88, Tefl89, Tefl90, Tefl91, Tefl92, Tefl93, Tefl94, Tefl95, Tefl96, Tefl97, Tefl98, Tefl99, Tefl100, | 108   |
| GO.0070897 | DNA-templated transcriptional preinitiation complex | 0.00285 | Gtf2a2, Polr1e, Taf7                                                                                                                                                                                                                                                                                                                                                                                                                                                                                                                                                                                                                                                                                                                                                                                                                                                                                                                                                                                                                                                                                                                                                                                                                                                                                                                                                                                                                                                                                                                                                         | 3     |
| GO.0002252 | immune effector process                             | 0.00287 | Crep, Kcnj8, Mll5, Polr3b, Polr3c, Polr3d, Polr3e, Polr3f, Polr3h, Polr3k,                                                                                                                                                                                                                                                                                                                                                                                                                                                                                                                                                                                                                                                                                                                                                                                                                                                                                                                                                                                                                                                                                                                                                                                                                                                                                                                                                                                                                                                                                                   | 11    |
| GO.0031326 | regulation of cellular biosynthetic process         | 0.00367 | Bloc1s2b, Brwd3, Cd1d2, Cdk5, Chd2, Cttnb1, Cux1, Dmrt2, Dynll1, Ercc2, Ercc3, Gfi1b, Gtf2a1, Gtf2a2, Gtf2b, Gtf2e1, Gtf2e2, Gtf2h3, Gtf2h4, Gtf2h5, Hdac1, Klf1, Mll2, Mll5, Mnat1, Mxd1, Ndufa13, Ntrk3, Pcbd2, Phtf1, Polr1a, Polr1b, Polr1c, Polr1d, Polr1e, Setd2, Sfxn4, Sin3a, Taf1, Tbp,                                                                                                                                                                                                                                                                                                                                                                                                                                                                                                                                                                                                                                                                                                                                                                                                                                                                                                                                                                                                                                                                                                                                                                                                                                                                             | 43    |
| GO.0001701 | in utero embryonic development                      | 0.00651 | Cttnb1, Ercc2, Gab1, Grb2, Klf1, Mll2, Ptprr, Sbds, Setd2, Sin3a, Zfand5, mt-                                                                                                                                                                                                                                                                                                                                                                                                                                                                                                                                                                                                                                                                                                                                                                                                                                                                                                                                                                                                                                                                                                                                                                                                                                                                                                                                                                                                                                                                                                | 12    |
| GO.0006397 | mRNA processing                                     | 0.00708 | Cpsf1, Cpsf3, Cpsf4, Cstf1, Cstf2, Fip11l1, Papola, Ppih, Prpf4, Rbm20,                                                                                                                                                                                                                                                                                                                                                                                                                                                                                                                                                                                                                                                                                                                                                                                                                                                                                                                                                                                                                                                                                                                                                                                                                                                                                                                                                                                                                                                                                                      | 11    |
| GO.0032728 | positive regulation of interferon-beta production   | 0.00721 | Polr3b, Polr3c, Polr3d, Polr3f                                                                                                                                                                                                                                                                                                                                                                                                                                                                                                                                                                                                                                                                                                                                                                                                                                                                                                                                                                                                                                                                                                                                                                                                                                                                                                                                                                                                                                                                                                                                               | 4     |
| GO.0048731 | system development                                  | 0.0142  | Actg2, B2m, Baat, Bloc1s2b, Cad, Casq1, Ccdc66, Cdh2, Cdk5, Cdk5r1, Chd2, Cps1, Cttnb1, Cux1, Dmrt2, Duoxa1, Dynll1, Epha8, Ercc2, Ercc3, Gab1, Gfi1b, Golga4, Gpr149, Grb2, Hdac1, Klf1, Lamb2, Ltbp3, Mll5, Mnat1, Ndufv2, Plce1, Ptpn11, Ptprr, Rbm20, Sbds, Setd2, Sin3a, Snap25,                                                                                                                                                                                                                                                                                                                                                                                                                                                                                                                                                                                                                                                                                                                                                                                                                                                                                                                                                                                                                                                                                                                                                                                                                                                                                        | 43    |
| GO.0006379 | mRNA cleavage                                       | 0.0151  | Cpsf1, Cpsf2, Wdr33                                                                                                                                                                                                                                                                                                                                                                                                                                                                                                                                                                                                                                                                                                                                                                                                                                                                                                                                                                                                                                                                                                                                                                                                                                                                                                                                                                                                                                                                                                                                                          | 3     |
| GO.0002376 | immune system process                               | 0.0195  | B2m, Cd1d2, Chd2, Crep, Cttnb1, Ercc2, Gfi1b, Kcnj8, Klf1, Mll5, Polr3b, Polr3c, Polr3d, Polr3e, Polr3f, Polr3h, Polr3k, Ptpn11, Sbds, Sin3a, Sos1,                                                                                                                                                                                                                                                                                                                                                                                                                                                                                                                                                                                                                                                                                                                                                                                                                                                                                                                                                                                                                                                                                                                                                                                                                                                                                                                                                                                                                          | 23    |
| GO.0061198 | fungiform papilla formation                         | 0.0285  | Cttnb1, Hdac1                                                                                                                                                                                                                                                                                                                                                                                                                                                                                                                                                                                                                                                                                                                                                                                                                                                                                                                                                                                                                                                                                                                                                                                                                                                                                                                                                                                                                                                                                                                                                                | 2     |
| GO.0018107 | peptidyl-threonine phosphorylation                  | 0.0397  | Cad, Cdk5, Taf1, Vrk1                                                                                                                                                                                                                                                                                                                                                                                                                                                                                                                                                                                                                                                                                                                                                                                                                                                                                                                                                                                                                                                                                                                                                                                                                                                                                                                                                                                                                                                                                                                                                        | 4     |
| GO.0006996 | organelle organization                              | 0.0418  | Arl1, Bbs12, Bloc1s2b, Brwd3, Casq1, Ccdc87, Cdk5, Cetrn2, Chd2, Cttnb1, Dynll1, Fam109a, Gtf2h4, Hdac1, Iqsec1, Klf1, Mis18bp1, Mll2, Mll5, Mrpl15, Polr1b, Sbds, Setd2, Sin3a, Snap25, Stx1a, Taf1, Tomm5, Vamp2, Vrk1, Xpc, Zmpste24                                                                                                                                                                                                                                                                                                                                                                                                                                                                                                                                                                                                                                                                                                                                                                                                                                                                                                                                                                                                                                                                                                                                                                                                                                                                                                                                      | 32    |
| GO.0017156 | regulation of calcium ion-dependent exocytosis      | 0.0466  | Cdk5, Stx1a, Syt1, Vamp2                                                                                                                                                                                                                                                                                                                                                                                                                                                                                                                                                                                                                                                                                                                                                                                                                                                                                                                                                                                                                                                                                                                                                                                                                                                                                                                                                                                                                                                                                                                                                     | 4     |

**Supplementary Table 3.** KEGG pathway analysis of 113 genes correlated with tumor volumes.  $P < 0.01$ .

| <b>Pathway ID</b> | <b>Pathway description</b>                  | <b>Count</b> | <b>FDR</b> |
|-------------------|---------------------------------------------|--------------|------------|
| 3020              | RNA polymerase                              | 17           | 1.23E-27   |
| 240               | Pyrimidine metabolism                       | 19           | 1.29E-19   |
| 3022              | Basal transcription factors                 | 14           | 6.57E-18   |
| 5169              | Epstein-Barr virus infection                | 19           | 3.17E-14   |
| 230               | Purine metabolism                           | 18           | 3.34E-14   |
| 4623              | Cytosolic DNA-sensing pathway               | 12           | 9.62E-13   |
| 1100              | Metabolic pathways                          | 33           | 1.88E-09   |
| 3420              | Nucleotide excision repair                  | 8            | 2.57E-08   |
| 190               | Oxidative phosphorylation                   | 11           | 8.35E-08   |
| 3015              | mRNA surveillance pathway                   | 9            | 4.44E-07   |
| 5203              | Viral carcinogenesis                        | 11           | 4.78E-06   |
| 4721              | Synaptic vesicle cycle                      | 4            | 0.0186     |
| 5211              | Renal cell carcinoma                        | 4            | 0.0209     |
| 250               | Alanine, aspartate and glutamate metabolism | 3            | 0.0312     |

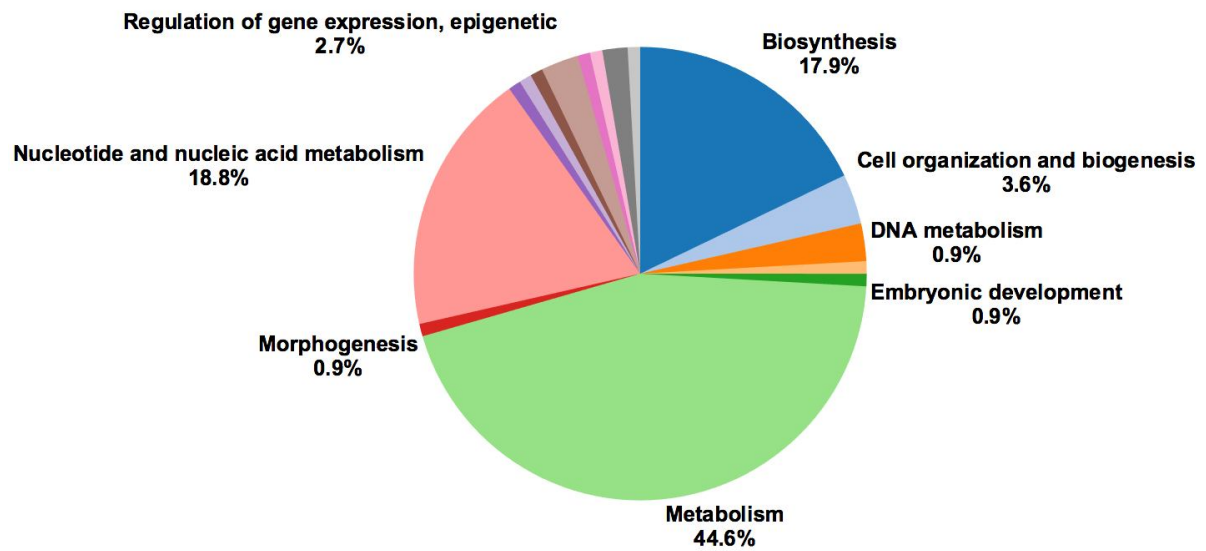

**Supplementary Figure 1.** Summary of gene ontology (GO) analysis of 113 genes correlated with tumor volumes.  $P < 0.01$ .
